# Supplementary material for: LncRNA KCNQ1OT1 enhanced the methotrexate resistance of colorectal cancer cells by regulating miR‐760/PPP1R1B via the cAMP signalling pathway
Source: PubMed Central journal article supplement (PMC6533496; doi:10.1111/jcmm.14071), 2019-04-17

**A**

HT29/MTX

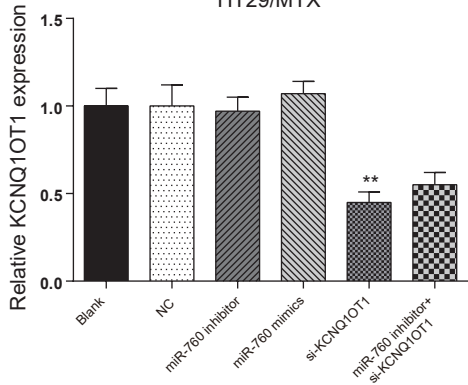**B**

Caco2/MTX

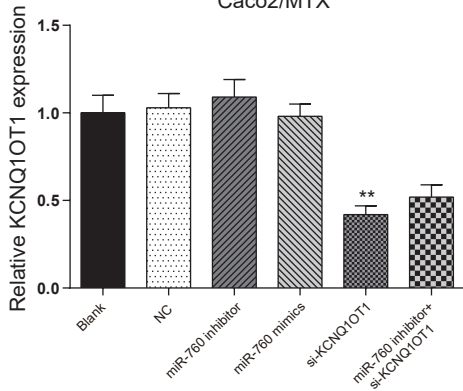

Supplement: JCMM-23-3808-s002.pdf [file JCMM-23-3808-s002.pdf]
